# Supplementary material
Source: PubMed Central journal article supplement (PMC4836621)

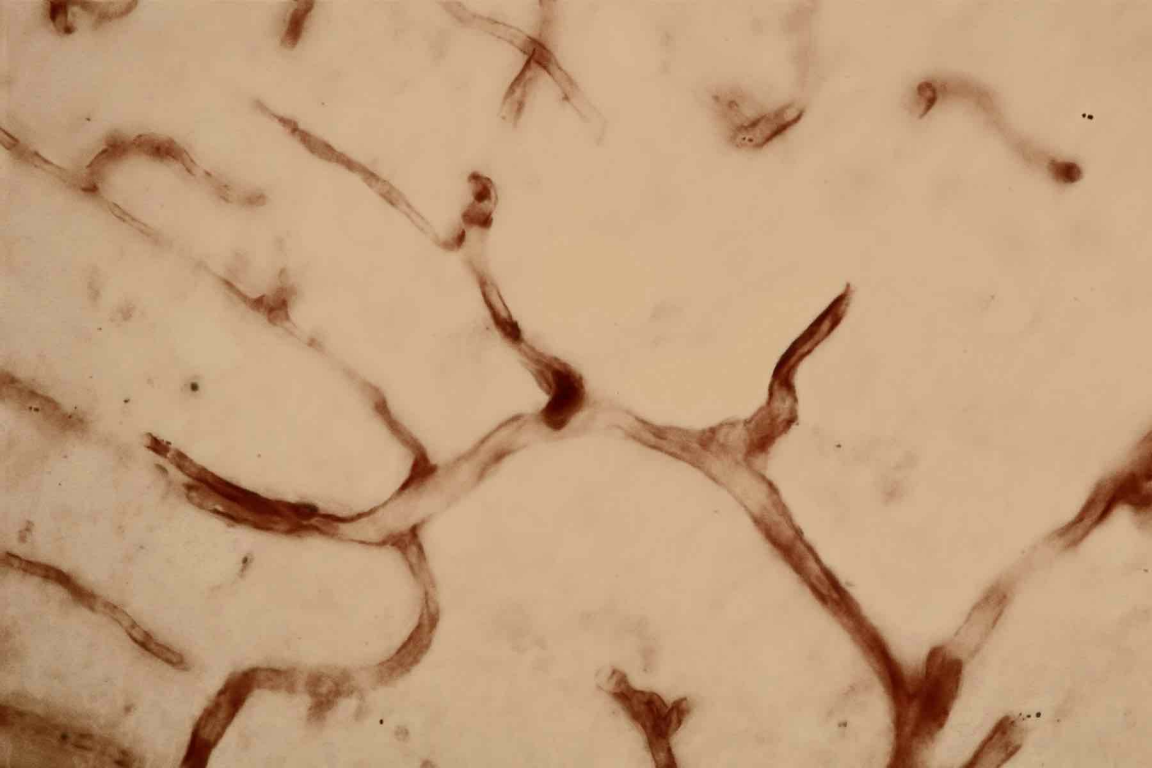

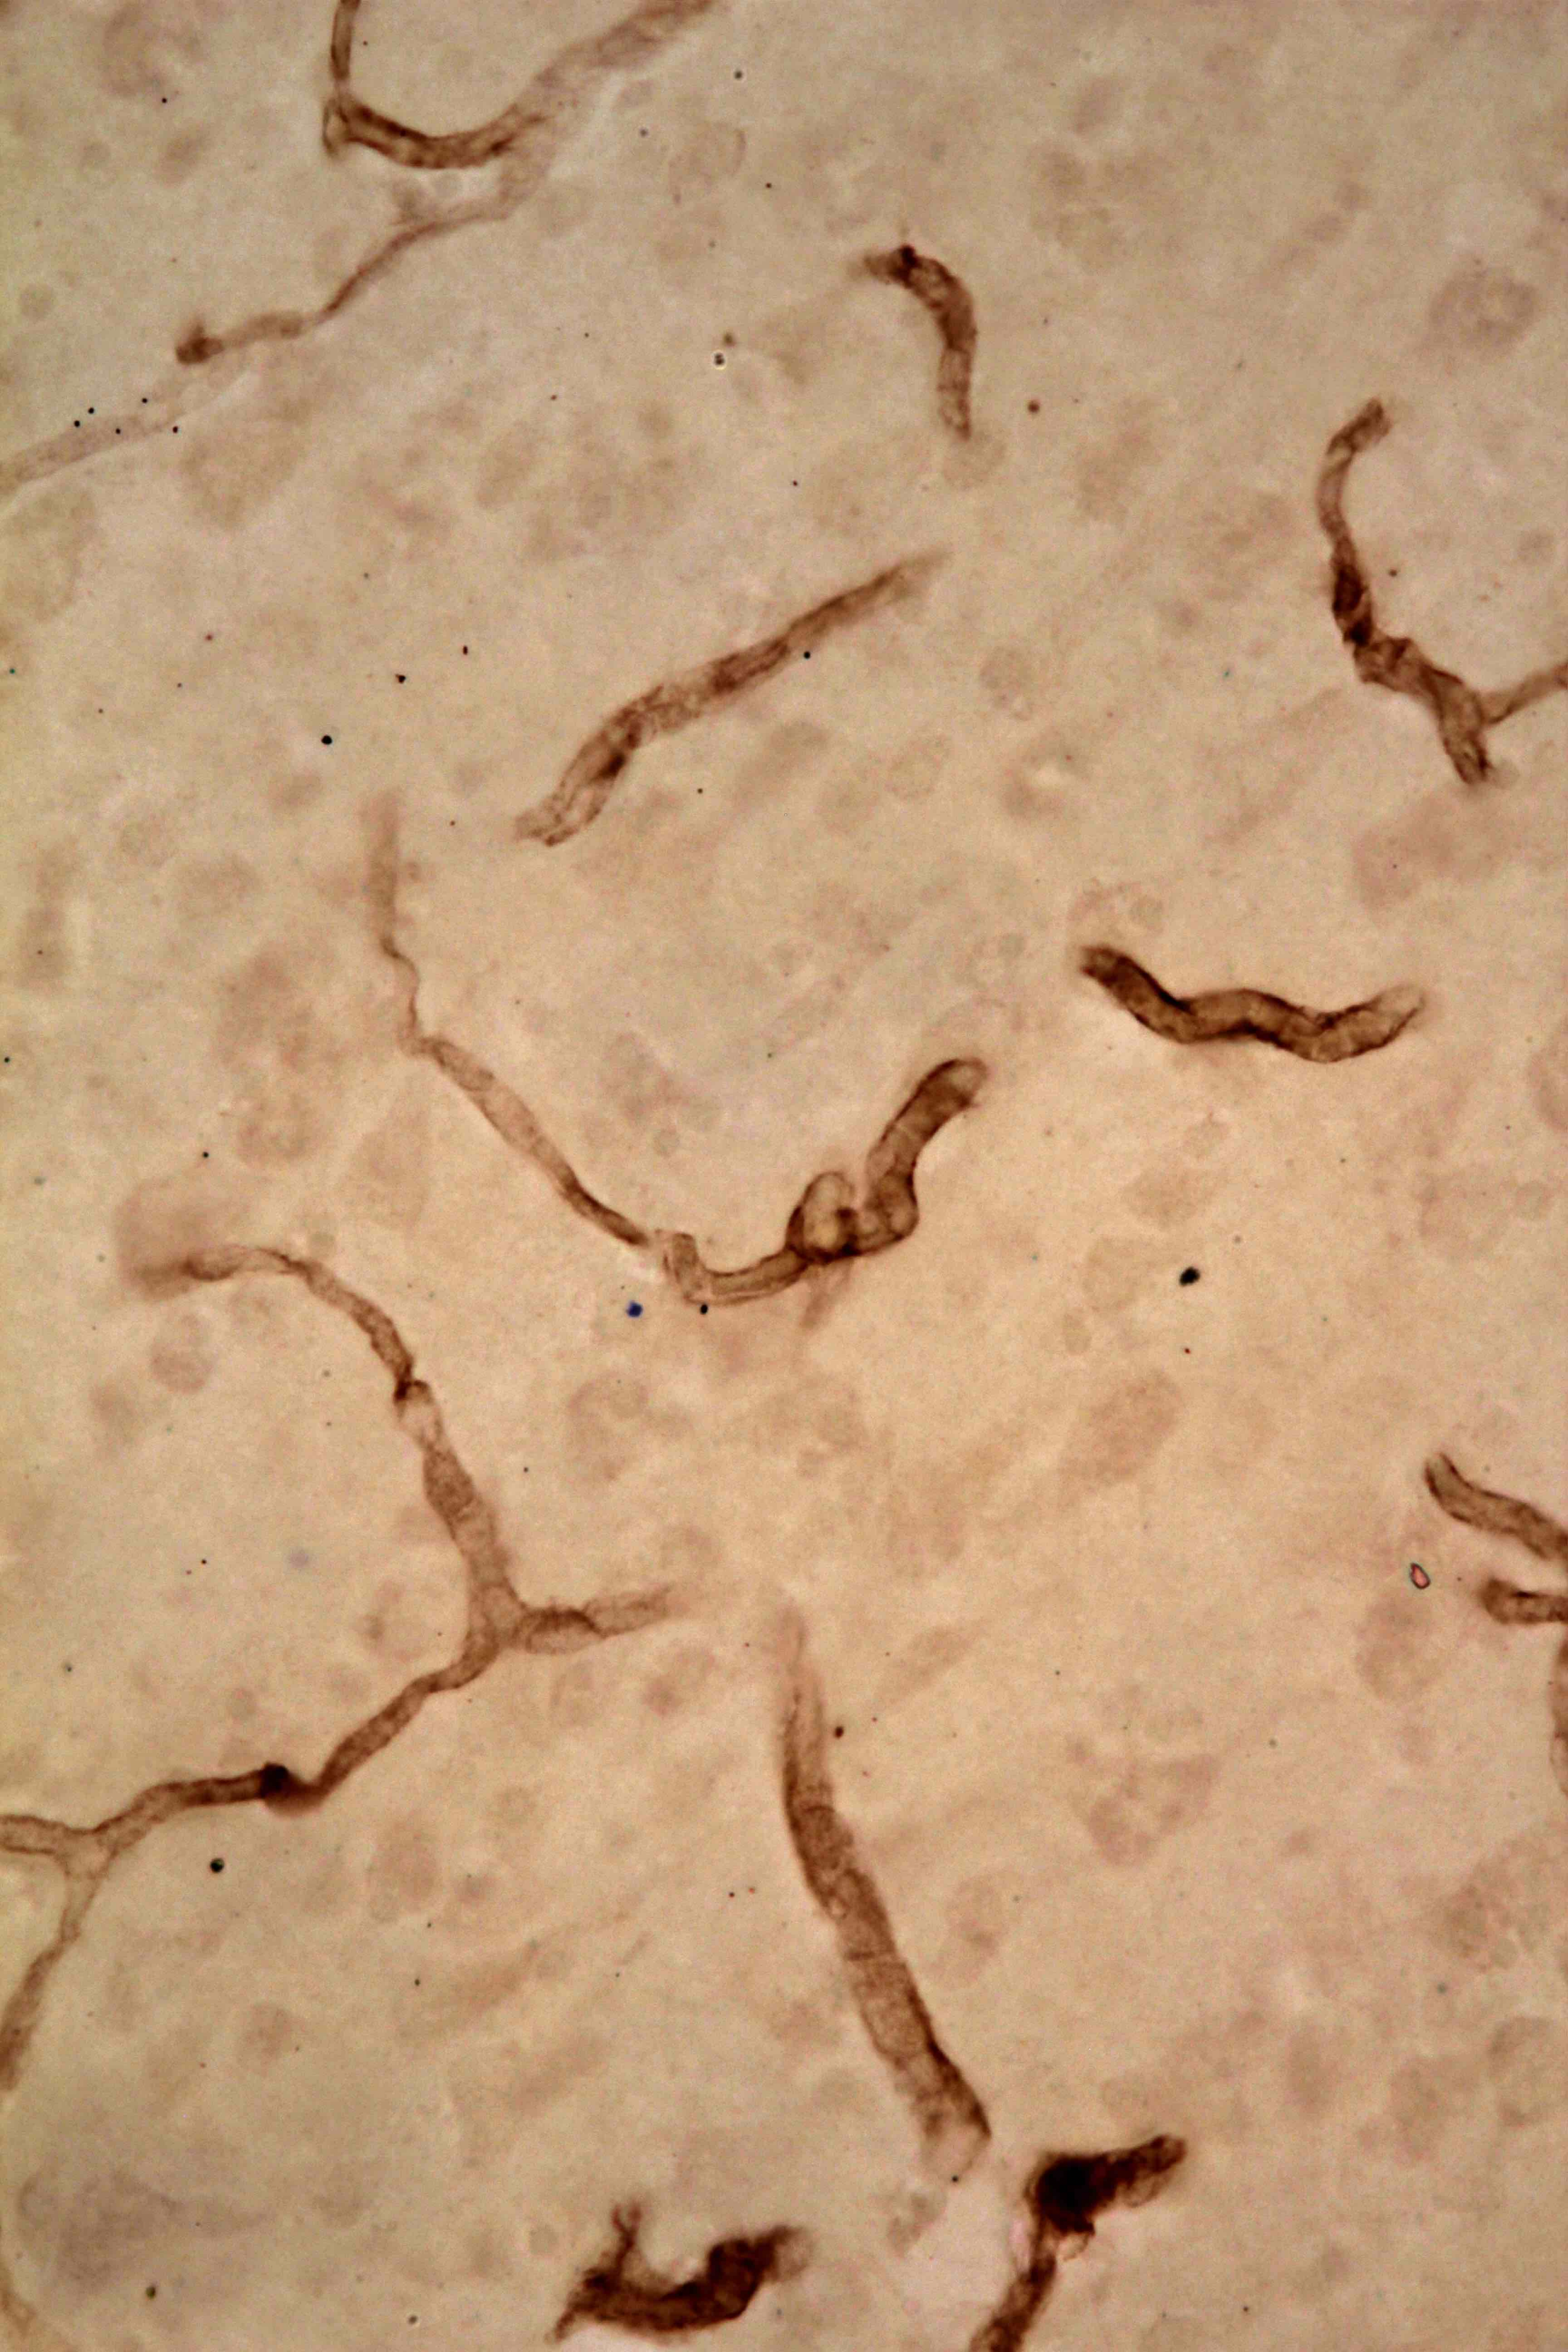

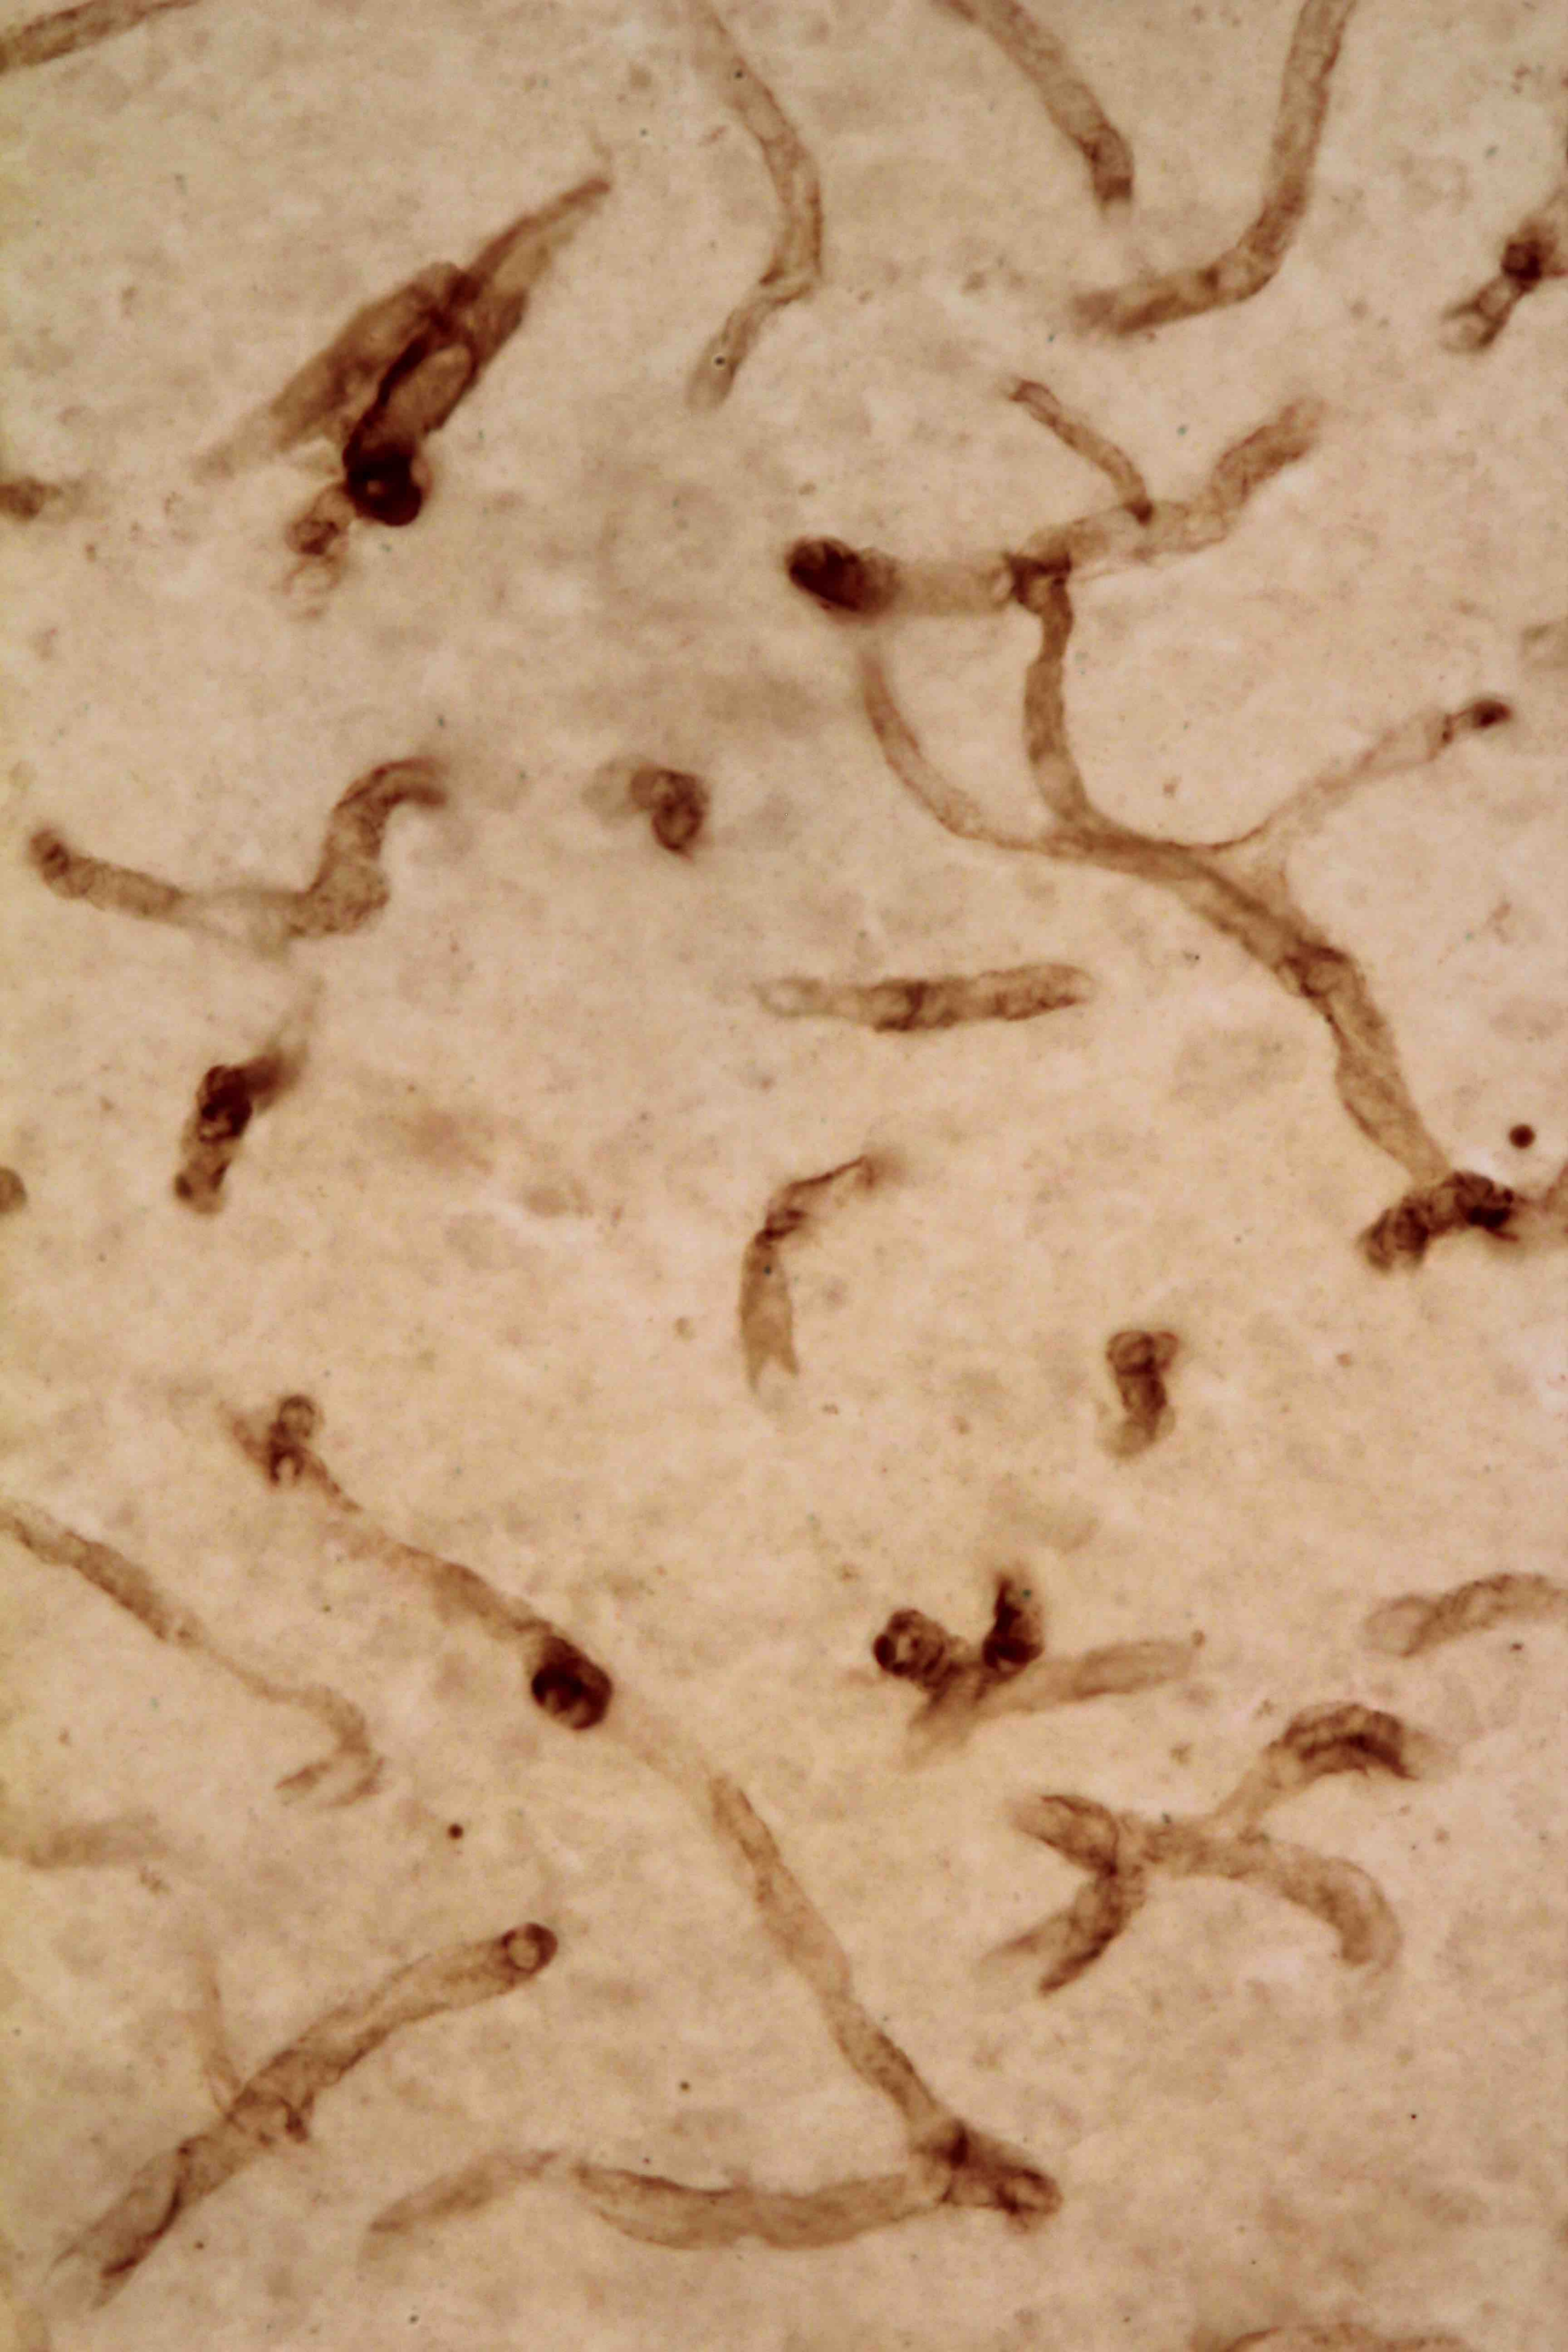

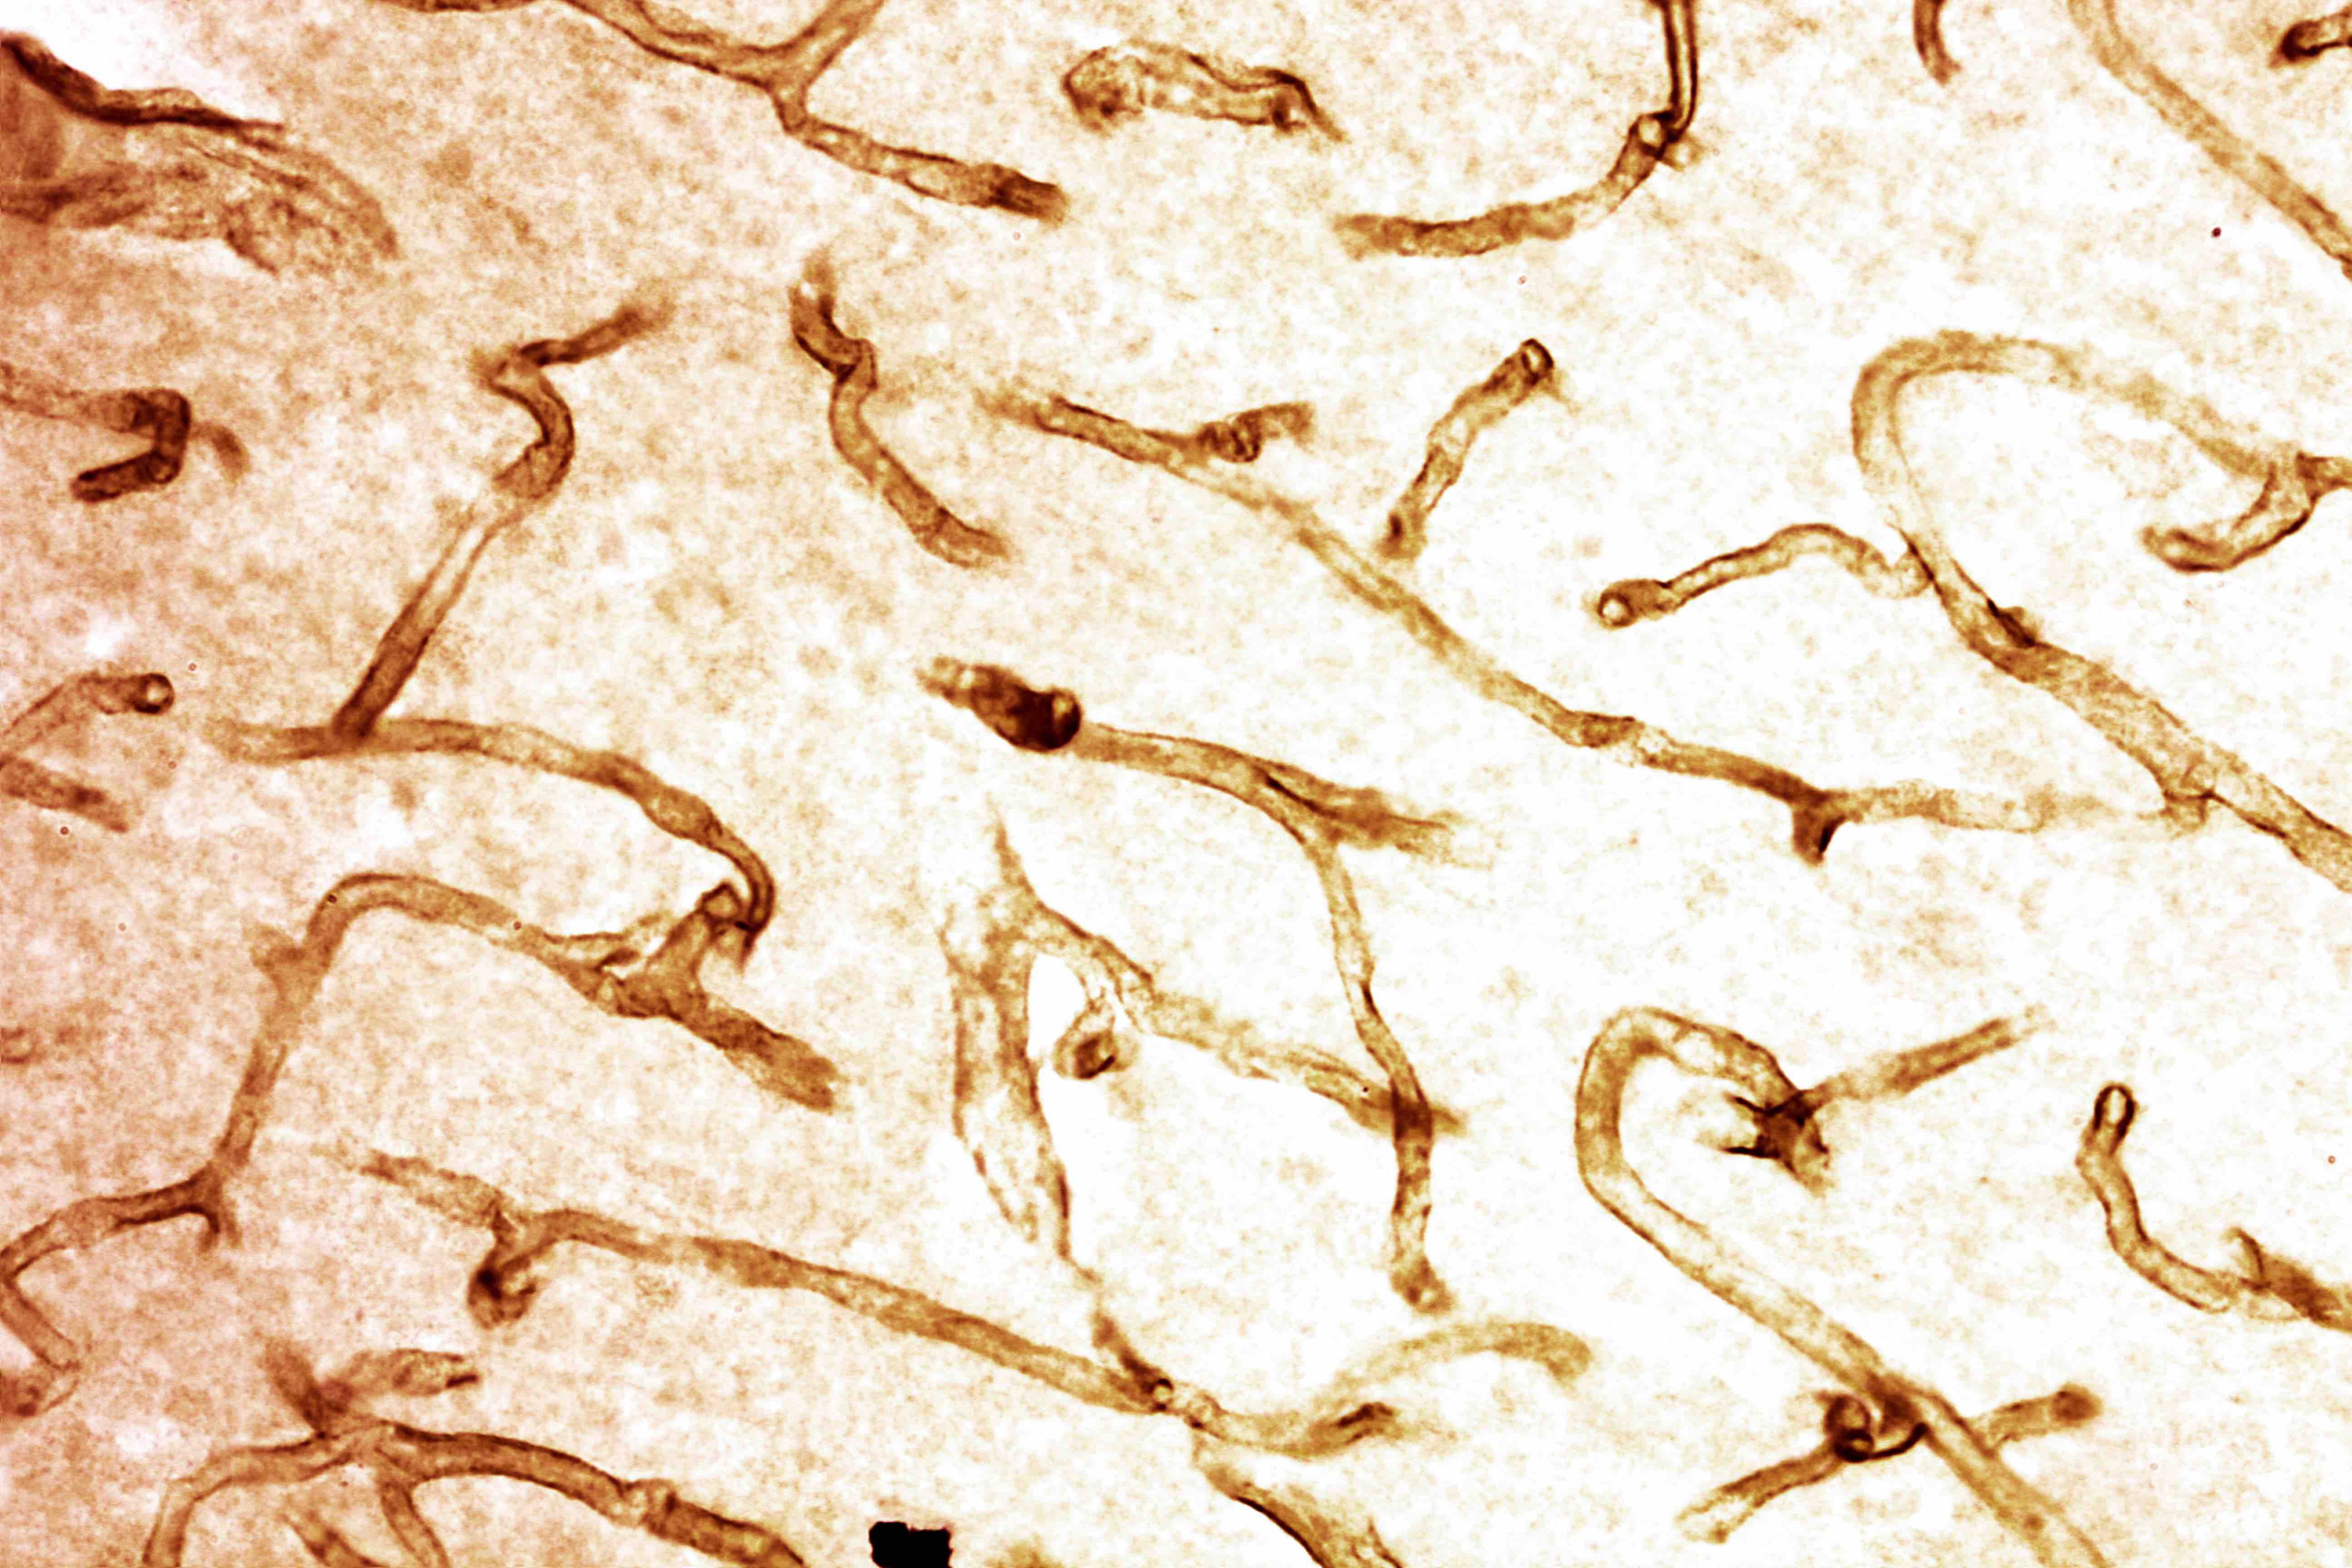

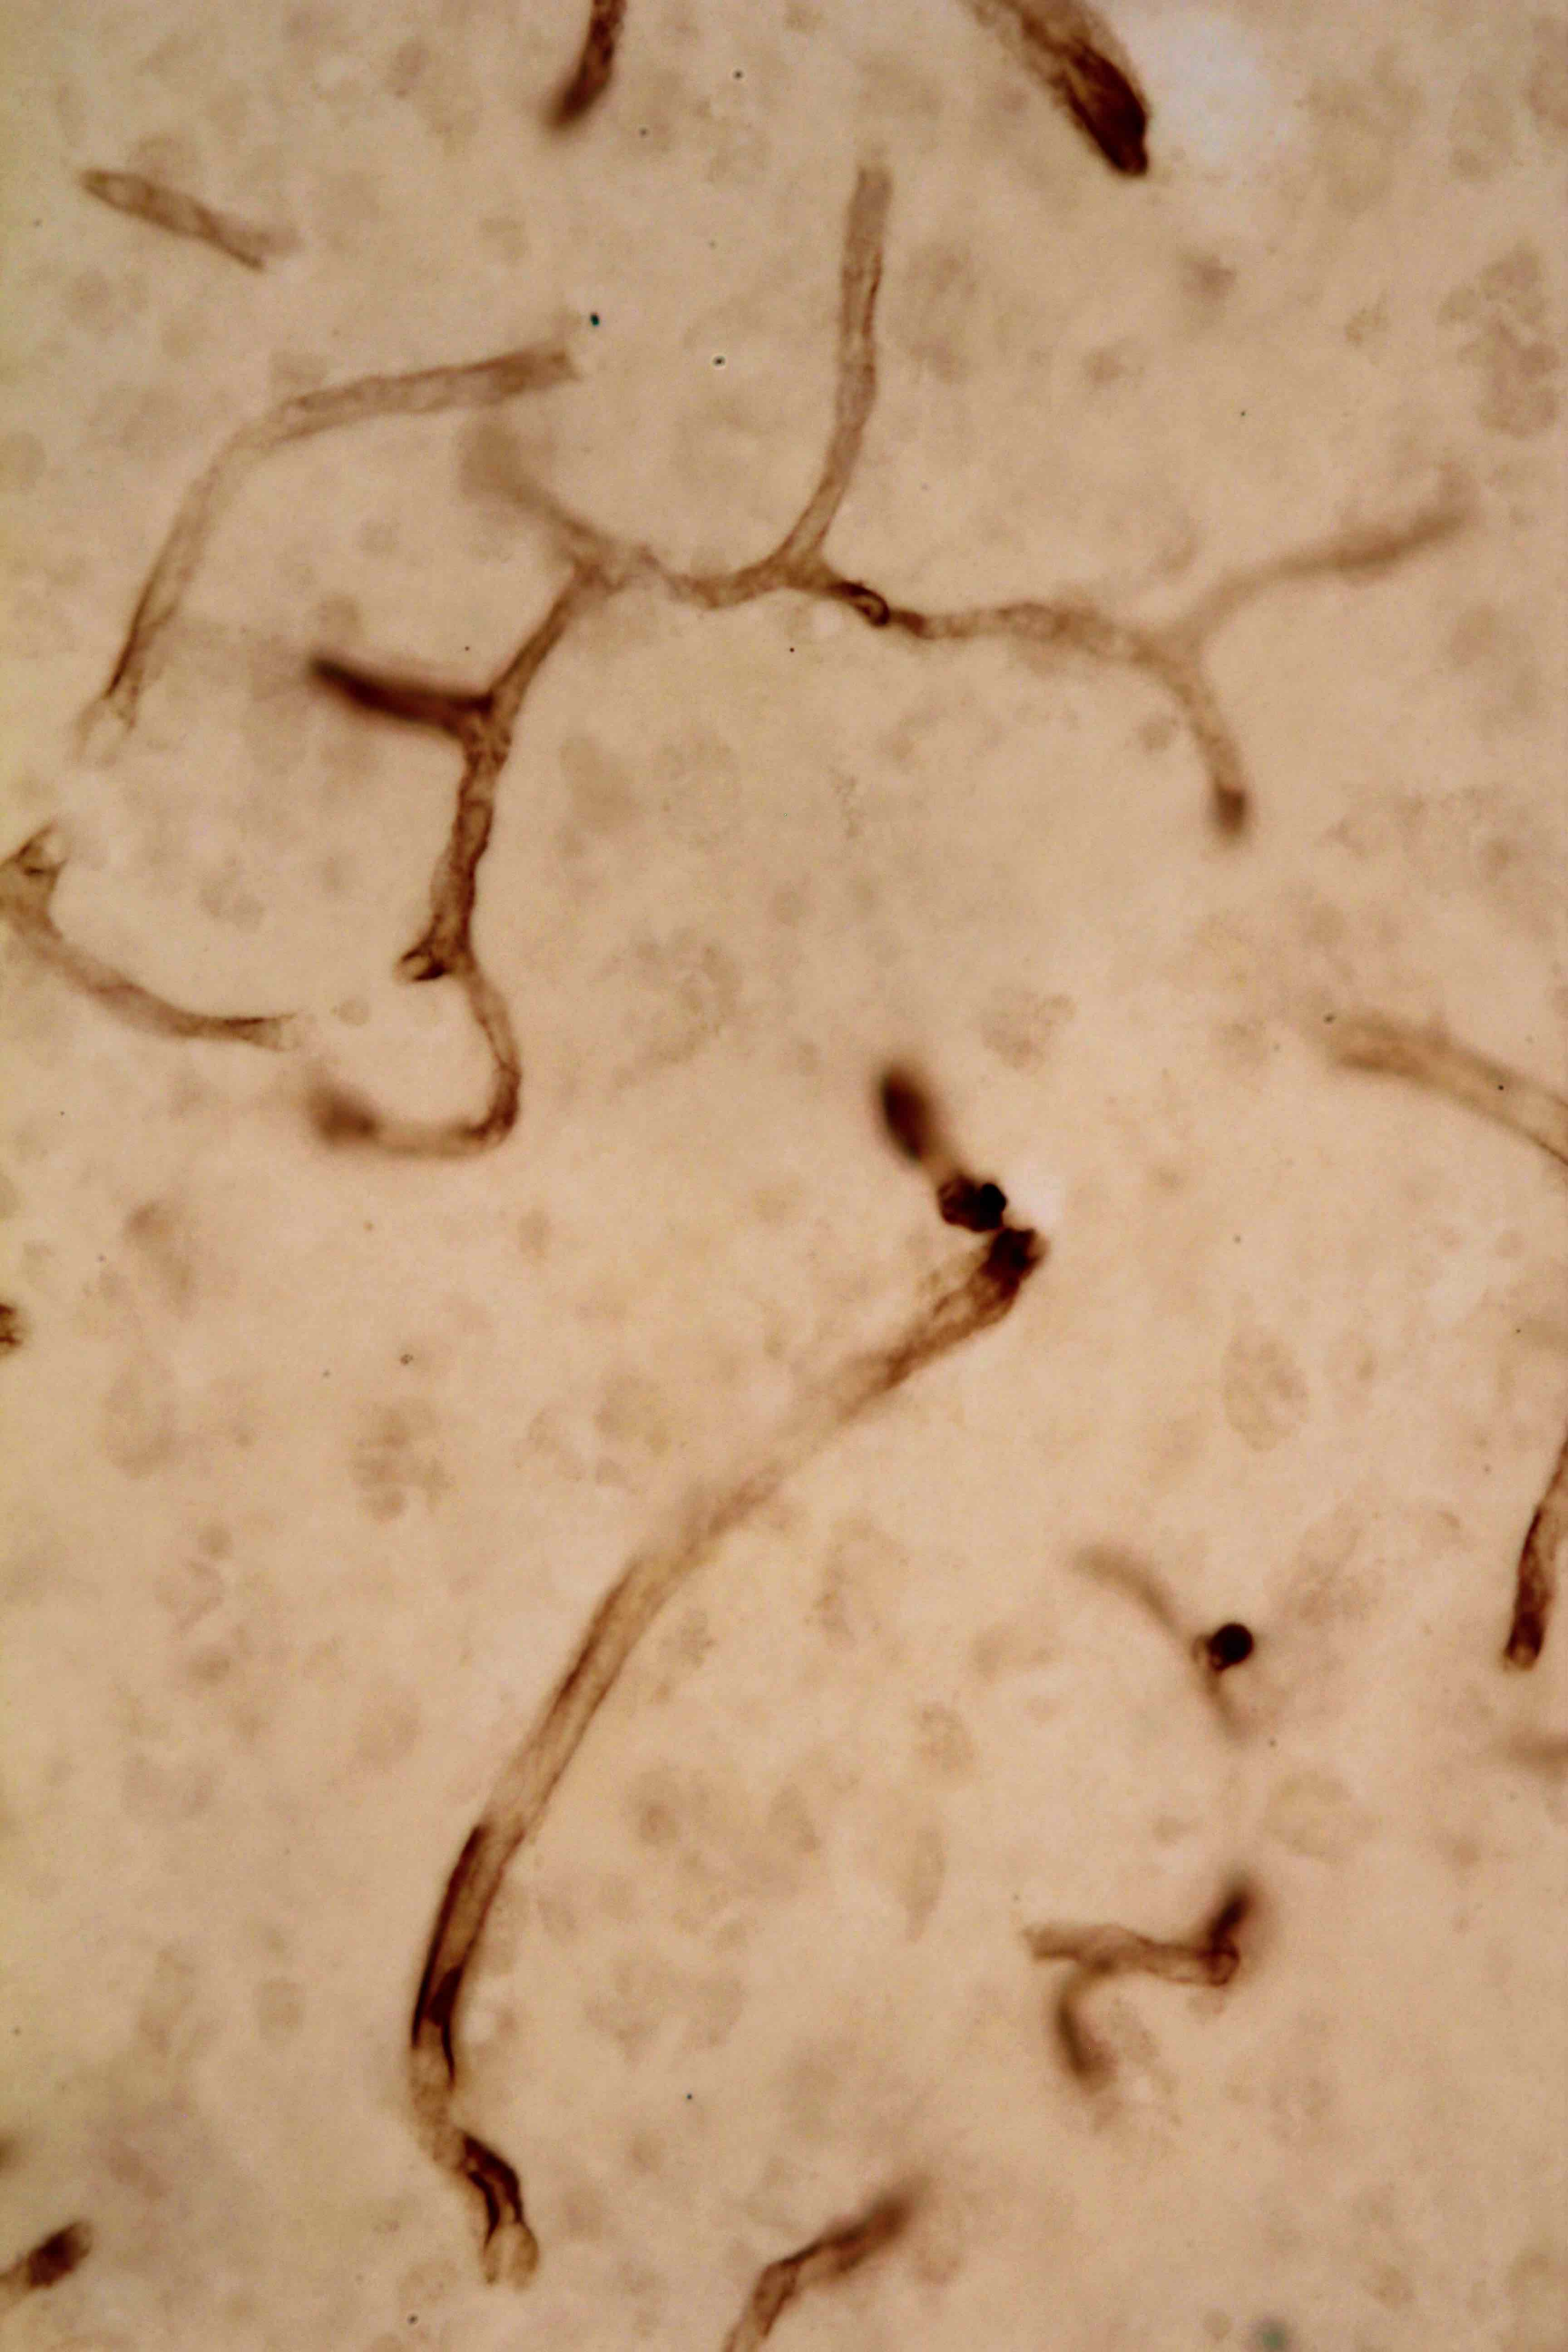

Supplement: NIHMS769194-supplement-Supplemental_1-5.pdf [file NIHMS769194-supplement-Supplemental_1-5.pdf]
